# Supplementary material for: IRE1-bZIP60 Pathway Is Required for Nicotiana attenuata Resistance to Fungal Pathogen Alternaria alternata
Source: Front Plant Sci. 2019 Mar 19;10:263. doi: 10.3389/fpls.2019.00263 (PMC6434776; doi:10.3389/fpls.2019.00263)
Supplement: SUPPLEMENTARY TABLE 1 — All primers used in this study. [file Table_1.XLSX]

## Sheet: Sheet1
primers	Primer sequence 5'-3'	purpose	citation	Accesion number for target genes
XZ93	TCTGCTGTGCTCTTGTTGGA	real time PCR primer for bZIP60 (u)	this study	XM_019396471
XZ94	ATTAACCACGGTTGGCTGGG		this study	XM_019396471
XZ153	TCTCCAGTGCTGTCTTGCAG	real time PCR primer for bZIP60 (s)	this study	XM_019396471
XZ154	AACCCAACAGCAGACTCCT		this study	XM_019396471
XZ97	cataagcttACCCCAAACCCCCGTATTTC	VIGS for bZIP60	this study	XM_019396471
XZ98	catggatccGAAGAGATTGTCGGCGGGAT		this study	XM_019396471
XZ141	ACCCCAAACCCCCGTATTTC	PCR for full lenth of bZIP60	this study	XM_019396471
XZ142	TCCACCAAGGGAAAGGATTTGA		this study	XM_019396471
XZ159	cataagctTCTGCCCACATACACGCTTT	VIGS for IRE1a	this study	XM_019409728.1
XZ160	catggatccGCAAAGAGAAGCAGCCCCTA		this study	XM_019409728.1
XZ161	ACAGACGTCGAAGTCAGCAG	real time PCR primer for IRE1a	this study	XM_019409728.1
XZ162	AATATTGCGAACTGGCGTGC		this study	XM_019409728.1
XZ163	cataagcttCGGGGTGGAGTACGATCAAG	VIGS for IRE1b	this study	XM_019389310.1
XZ164	catggatccTTCATGCAAATGGGCAAGGC		this study	XM_019389310.1
XZ165	TGCATAACCGGGGGAAAACA	real time PCR primer for IRE1b	this study	XM_019389310.1
XZ166	GCATCCCGGAGGAATGAGAG		this study	XM_019389310.1
XZ171	GACGACAACCAGAGTGCTGA	real time PCR primer for BiP	this study	XM_019373376.1
XZ172	TATCGGGTTGCACACAGCTT		this study	XM_019373376.1
XZ179	GCAGCCATTGAGTCGTTTGG	real time PCR primer for PDI	this study	XM_019393813.1
XZ180	ATCTGGTTGCTTACCAGCCG		this study	XM_019393813.1
XZ181	GCTTCTTGTGAGTGAGAAGG	real time PCR primer for CNX1-like	this study	XM_019379334
XZ182	TTCCTGGAGGCGAACTTCAT		this study	XM_019379334
XZ183	GTGCCAGGAAGCCTGAAGAT	real time PCR primer for CRT	this study	XM_019387223.1
XZ184	TTGGGAATTGTTGGGGCTGT		this study	XM_019387223.1
NaLOX3_F	TCGATCCTCACCACCCTCAT	real time PCR primer for LOX3	Sun et al 2017	AY254349
NaLOX3_R	CGGGATCATTCTCATCGGGG		Sun et al 2017	AY254349
NaAOS_F	CGTACCCGATCGGTTCGTAG	real time PCR primer for AOS	Sun et al 2017	XM_019399851.1
NaAOS_R	ACCAGCACCACGAAATCCTT		Sun et al 2017	XM_019399851.1
JS142_F	CGAGTTATGGCTAATGGCAGC	real time PCR primer for F6'H1	Sun et al 2014	KF771989
JS143_R	AGCACTTCAGCCAAAGGACC	real time PCR primer for F6'H1	Sun et al 2014	KF771989
